# Supplementary material
Source: publisher figshare collection journal article supplement (https://sage.figshare.com/ndownloader/files/20020751)
Supplement: Supplementary file 1 [file 20020751]

# CERTIFICATE OF ENGLISH EDITING

This document certifies that the paper listed below has been edited to ensure that the language is clear and free of errors. The edit was performed by professional editors at Editage, a division of Cactus Communications. The intent of the author's message was not altered in any way during the editing process. The quality of the edit has been guaranteed, with the assumption that our suggested changes have been accepted and have not been further altered without the knowledge of our editors.

## TITLE OF THE PAPER

Treatment of penetrating trauma to the buttock assisted by spinal endoscopy

## AUTHORS

Zhi-Sheng Long, Xiao-Yang Nie, Yuan-Wei Zhang

## JOB CODE

ANNWE\_2

Signature

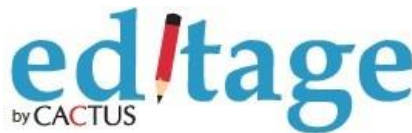

*Vikas Narang*

Vikas Narang,  
Vice President, Author Services, Editage

Date of Issue  
**Aug 27, 2019**

Editage, a brand of Cactus Communications, offers professional English language editing and publication support services to authors engaged in over 500 areas of research. Through its community of experienced editors, which includes doctors, engineers, published scientists, and researchers with peer review experience, Editage has successfully helped authors get published in internationally reputed journals. Authors who work with Editage are guaranteed excellent language quality and timely delivery.

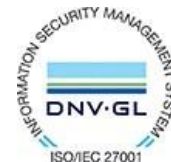

**CACTUS**

### Contact Editage

Worldwide  
request@editage.com  
+1 877- 334- 8243  
www.editage.com

Japan  
submissions@editage.com  
+81 03- 6868- 3348  
www.editage.jp

Korea  
submit-  
korea@editage.com  
1544- 9241  
www.editage.co.kr

China  
fabiao@editage.cn  
400- 005- 6055  
www.editage.cn

Brazil  
contato@editage.com  
0800- 892- 20- 97  
www.editage.com.br
